# Supplementary material for: Highly Sensitive Fluorescent Detection of Acetylcholine Based on the Enhanced Peroxidase-Like Activity of Histidine Coated Magnetic Nanoparticles
Source: MDPI journal article supplement (doi:10.3390/nano11051207), 2021-05-01
Supplement: s1 [file s1]

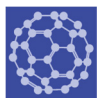

## Supplementary Materials

# Highly sensitive fluorescent detection of acetylcholine based on the enhanced peroxidase-like activity of histidine coated magnetic nanoparticles

Hong Jae Cheon,<sup>†</sup> Quynh Huong Nguyen,<sup>†</sup> and Moon Il Kim\*

Department of BioNano Technology, Gachon University, 1342 Seongnamdae-ro, Sujeong-gu, Seongnam, Gyeonggi 13120, Republic of Korea; hjchun1201@naver.com (H.J.C.); prudence122@gmail.com (Q.H.N.)

\*Correspondence: moonil@gachon.ac.kr (M.I.K.); Tel.: +82-31-750-8563

### *Methods for investigating the mechanism for the peroxidase-like activity of His@MNPs*

Generation of the free  $\cdot\text{OH}$  radicals as the reactive intermediates during the decomposition of  $\text{H}_2\text{O}_2$  mediated by the peroxidase activity of His@MNPs was demonstrated via a fluorescence assay. To perform this experiment, terephthalic acid (TA) probe was deployed since it can react with  $\cdot\text{OH}$  radicals to generate highly fluorescent 2-hydroxyterephthalic acid that exhibits a signature emission at around 430 nm. The experiment was conducted in a mixture containing 100  $\mu\text{L}$  TA (5 mM), 100  $\mu\text{L}$  sample (100  $\mu\text{g}/\text{mL}$  pristine MNPs or His@MNPs) and 100  $\mu\text{L}$   $\text{H}_2\text{O}_2$  (100 mM) in a 700  $\mu\text{L}$  of 0.1 M sodium acetate buffer (pH 5.5). The mixture then was incubated in dark condition for 12 hours. Consequently, the fluorescence spectra were recorded at the excitation wavelength at 315 nm, in a black 96 well-plate using microplate reader.

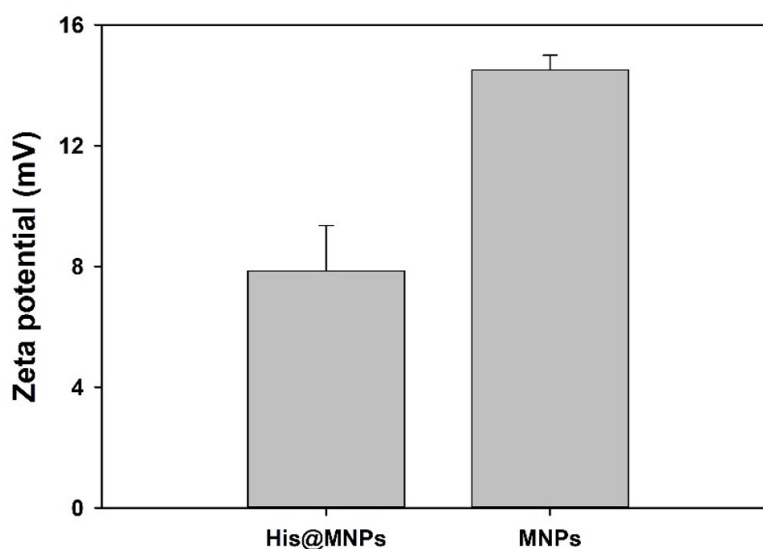

**Figure S1.** Zeta potential values of His@MNPs and pristine MNPs in sodium acetate buffer (0.1M, pH 4.0).

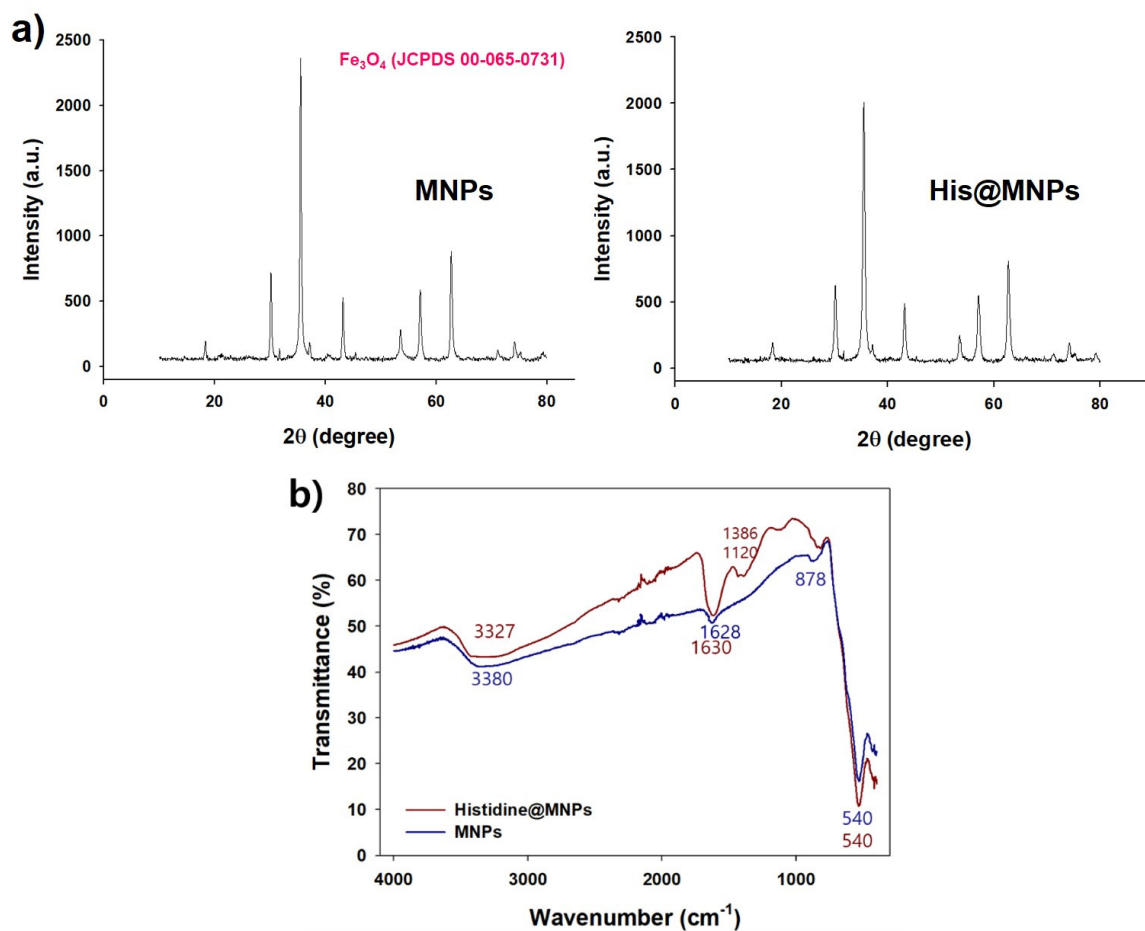

Figure S2. a) XRD and b) FT-IR spectra of His@MNPs and pristine MNPs.

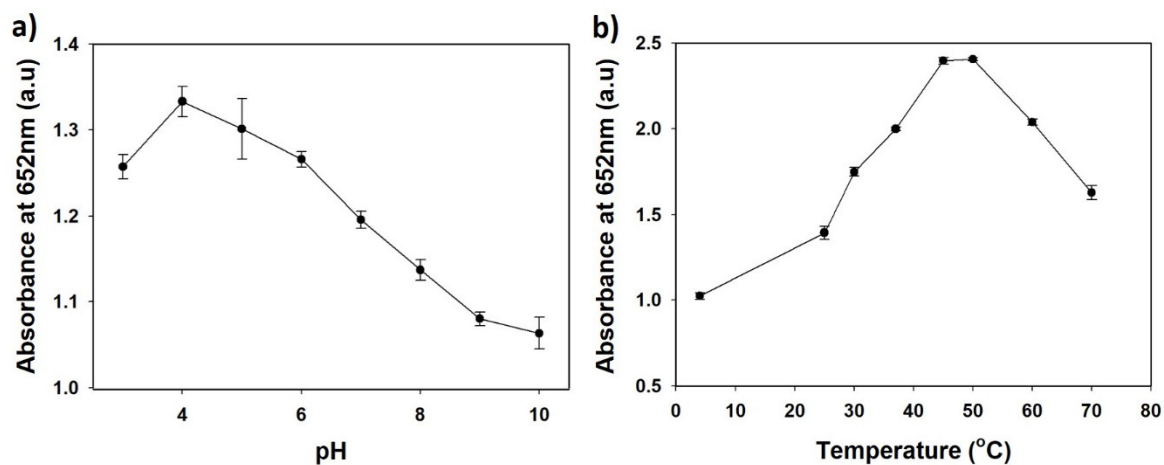

Figure S3. Effects of a) pH and b) temperature on the catalytic activity for TMB oxidation catalyzed by His@MNPs.

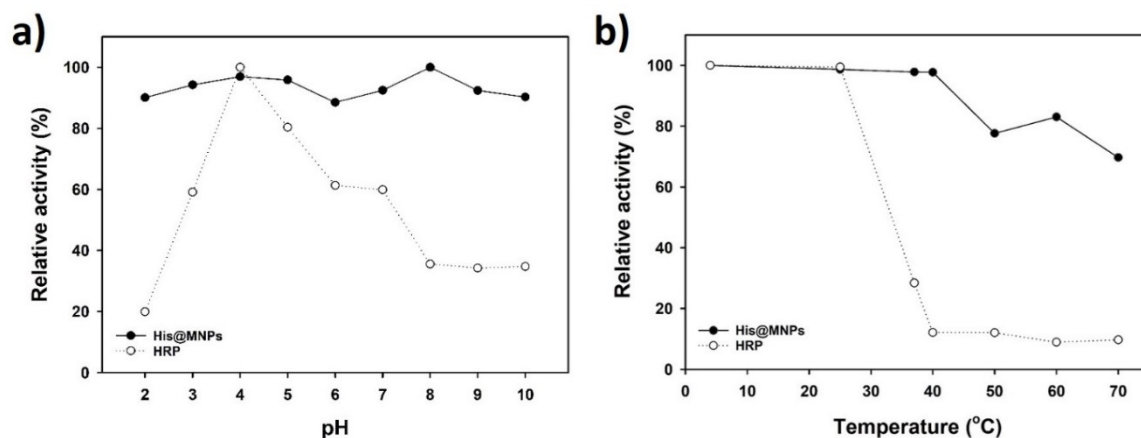

**Figure S4.** Catalytic stabilities of His@MNPs and HRP against a) pH and b) temperature. In this experiment, His@MNPs and HRP were incubated at diverse a) pH and b) temperature conditions for 5 h and then their peroxidase activities were measured at a standard assay conditions (pH 4.0). The maximum relative activity in the y-axis of each curve was set at 100%.

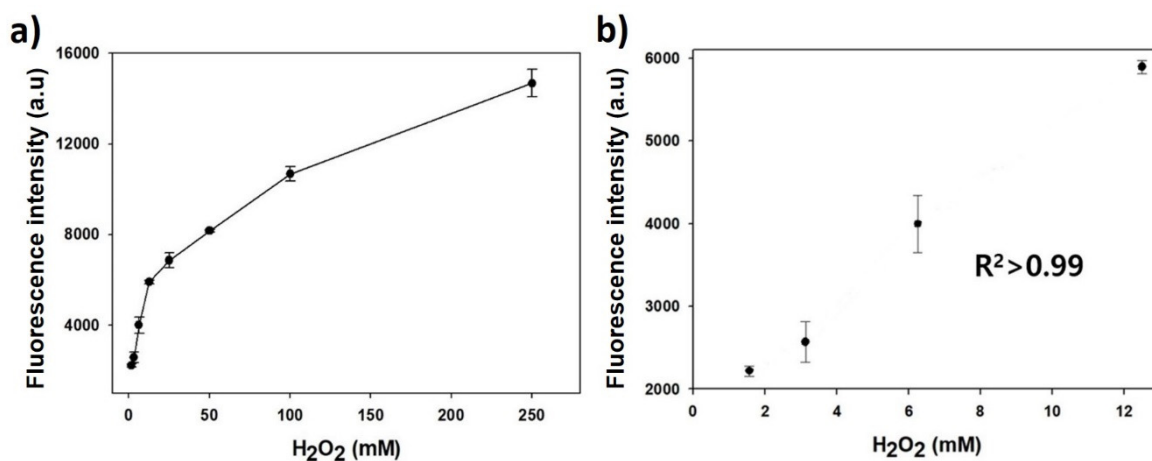

**Figure S5.** a) Dose-response curve for the detection of  $H_2O_2$  and b) their corresponding linear calibration plot using His@MNPs as peroxidase mimics and AUR substrate.

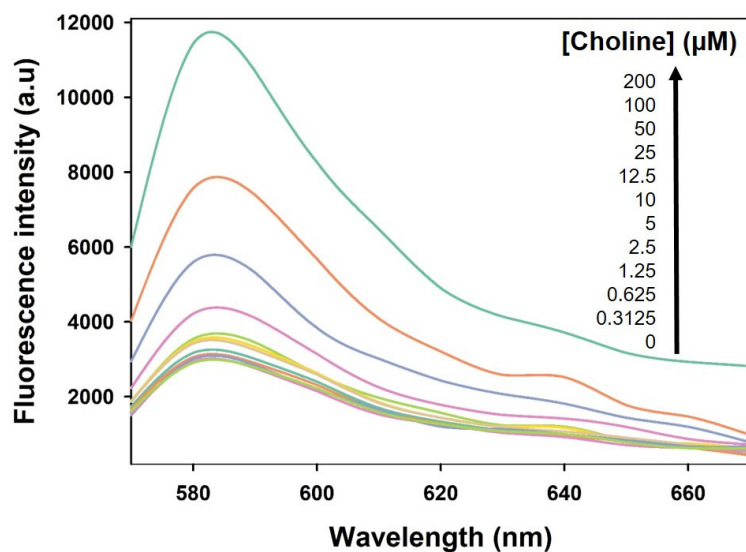

**Figure S6.** Fluorescence emission spectra for the detection of choline.

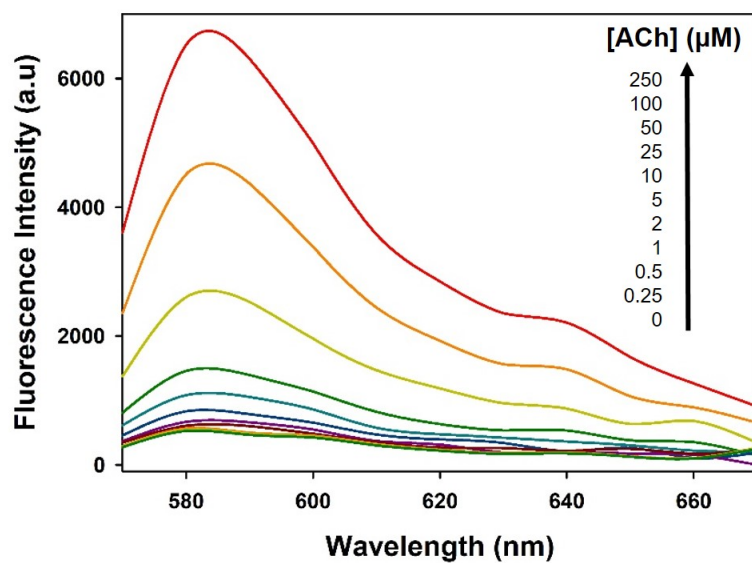

**Figure S7.** Fluorescence emission spectra for the detection of ACh.

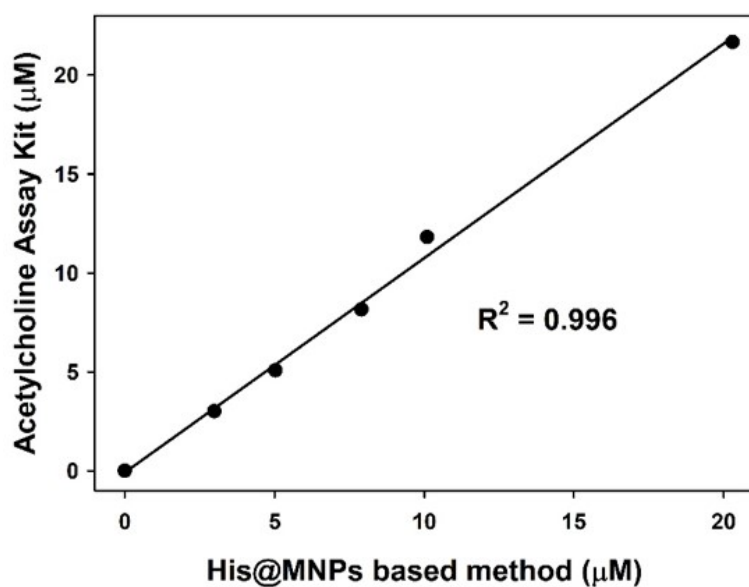

**Figure S8.** Correlation between His@MNPs based method (x) and Choline/Acetylcholine detection kit (y) for the quantitative determination of ACh.

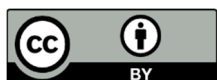

© 2021 by the authors. Submitted for possible open access publication under the terms and conditions of the Creative Commons Attribution (CC BY) license (<http://creativecommons.org/licenses/by/4.0/>).
